# Supplementary material
Source: PubMed Central journal article supplement (PMC7513422)
Supplement: NIHMS1603412-supplement-1.pdf [file NIHMS1603412-supplement-1.pdf]

**Supplemental Table S1.** Baseline demographics, with and without imputation (n=1614)

| <b>Characteristic</b>                 | <b>Study population without imputation</b> | <b>Study population with imputation<sup>1</sup></b> |
|---------------------------------------|--------------------------------------------|-----------------------------------------------------|
| <b>Age at enrollment</b>              |                                            |                                                     |
| Mean (SD) age (years)                 | 31.8 (5.2)                                 | 31.8 (5.2)                                          |
| <25 years                             | 153 (9.5)                                  | 153 (9.5)                                           |
| 25 - <30 years                        | 348 (21.6)                                 | 348 (21.6)                                          |
| 30 - <35 years                        | 665 (41.2)                                 | 665 (41.2)                                          |
| ≥ 35 years                            | 448 (27.8)                                 | 448 (27.8)                                          |
| <b>Year of enrollment</b>             |                                            |                                                     |
| 1999                                  | 405 (25.1)                                 | 405 (25.1)                                          |
| 2000                                  | 597 (37.0)                                 | 597 (37.0)                                          |
| 2001                                  | 559 (34.6)                                 | 559 (34.6)                                          |
| 2002                                  | 53 (3.3)                                   | 53 (3.3)                                            |
| <b>Pre-pregnancy BMI</b>              |                                            |                                                     |
| Median (IQR) BMI (kg/m <sup>2</sup> ) | 23.6 (21.2 – 27.5)                         | 23.6 (21.2 - 27.5)                                  |
| <25.0 kg/m <sup>2</sup>               | 985 (61.5)                                 | 993 (61.5)                                          |
| 25.0 - <30.0 kg/m <sup>2</sup>        | 357 (22.3)                                 | 359 (22.3)                                          |
| ≥ 30.0 kg/m <sup>2</sup>              | 260 (16.2)                                 | 262 (16.2)                                          |
| <b>Race/ethnicity</b>                 |                                            |                                                     |
| White                                 | 1094 (68.6)                                | 1104 (68.4)                                         |
| Black                                 | 250 (15.7)                                 | 254 (15.7)                                          |
| Other                                 | 252 (15.8)                                 | 256 (15.8)                                          |
| <b>Parity</b>                         |                                            |                                                     |
| 0                                     | 794 (49.2)                                 | 794 (49.2)                                          |
| 1                                     | 559 (34.6)                                 | 559 (34.6)                                          |
| >1                                    | 261 (16.2)                                 | 261 (16.2)                                          |
| <b>Education</b>                      |                                            |                                                     |
| < College graduate                    | 566 (35.5)                                 | 574 (35.6)                                          |
| College graduate or more              | 1030 (64.5)                                | 1040 (64.4)                                         |
| <b>Married or cohabitating</b>        |                                            |                                                     |
| No                                    | 141 (8.8)                                  | 143 (8.9)                                           |
| Yes                                   | 1454 (91.2)                                | 1471 (91.1)                                         |
| <b>Smoking status</b>                 |                                            |                                                     |
| Smoked during pregnancy               | 210 (13.1)                                 | 212 (13.2)                                          |
| Former                                | 298 (18.6)                                 | 300 (18.6)                                          |
| Never                                 | 1091 (68.2)                                | 1101 (68.2)                                         |
| <b>Annual household income</b>        |                                            |                                                     |
| ≤ \$70,000/year                       | 569 (39.7)                                 | 687 (42.5)                                          |
| >\$70,000/year                        | 863 (60.3)                                 | 927 (57.5)                                          |

<sup>1</sup>Calculated from all imputations and rounded Ns to the nearest integer; values may not sum to

1614.

**Supplemental Table S2.** Change in gestational weight gain by trimester, per doubling of plasma PFAS concentration (ng/mL)

| PFAS           | 1 <sup>st</sup> trimester (kg/wk) | 2 <sup>nd</sup> trimester (kg/wk) | 3 <sup>rd</sup> trimester (kg/wk) |
|----------------|-----------------------------------|-----------------------------------|-----------------------------------|
|                | $\beta$ (95% CI)<br>(n=1598)      | $\beta$ (95% CI)<br>(n=1594)      | $\beta$ (95% CI)<br>(n=1568)      |
| <b>PFOS</b>    | 0.00 (-0.01, 0.02)                | 0.00 (-0.01, 0.01)                | -0.00 (-0.01, 0.01)               |
| <b>PFOA</b>    | 0.01 (-0.01, 0.02)                | 0.01 (-0.01, 0.02)                | 0.00 (-0.01, 0.02)                |
| <b>PFHxS</b>   | 0.01 (-0.00, 0.02)                | 0.00 (-0.01, 0.01)                | -0.01 (-0.02, 0.00)               |
| <b>PFNA</b>    | 0.01 (-0.01, 0.02)                | 0.00 (-0.01, 0.01)                | -0.00 (-0.02, 0.01)               |
| <b>EtFOSAA</b> | 0.00 (-0.01, 0.01)                | 0.02 (0.01, 0.02)**               | 0.01 (0.00, 0.02)*                |
| <b>MeFOSAA</b> | -0.01 (-0.02, 0.01)               | 0.01 (-0.00, 0.02)                | -0.00 (-0.01, 0.01)               |

\*  $P < 0.05$ ; \*\* $P < 0.01$ ; models adjusted for age, pre-pregnancy BMI, marital status,

race/ethnicity, education, income, smoking, and parity; Models include all women including preterm births.

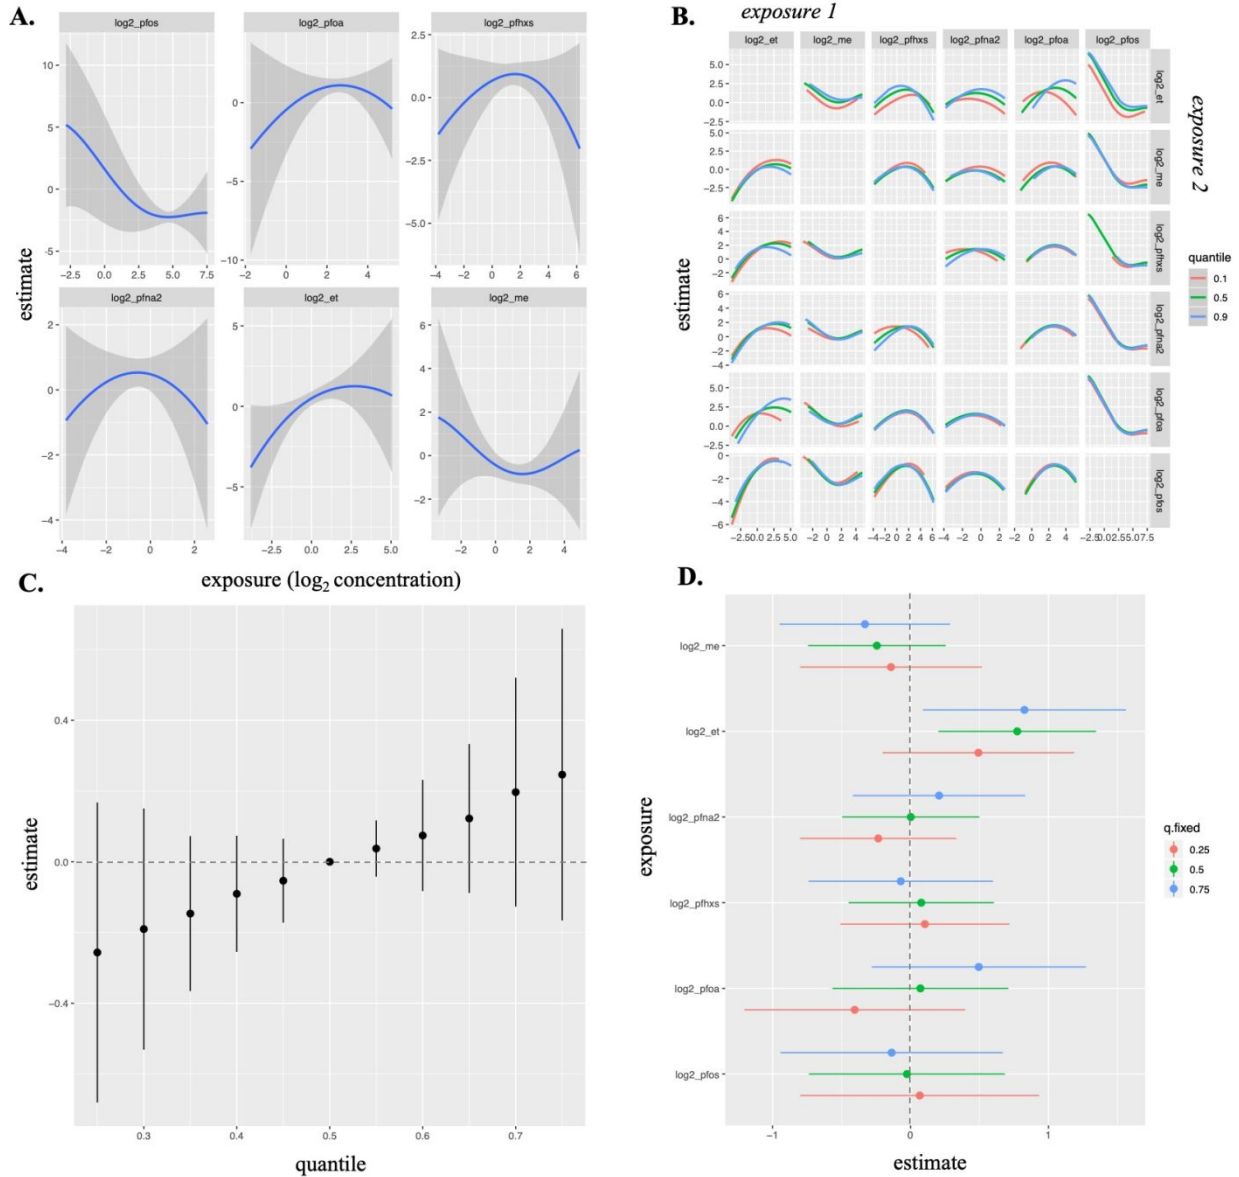

**Supplemental Figure S1.** Joint effect of the mixture of PFAS chemicals on gestational weight gain. Models adjusted for age, pre-pregnancy BMI, marital status, race/ethnicity, education, income, smoking, and parity. **Part (A)** shows the association and 95% credible intervals between each PFAS and gestational weight gain, holding all other PFASs fixed at the median. **Part (B)** shows bivariate relationships. In each rectangle, the three lines show the varying shape of the association between one PFAS (labeled along the top axis) and gestational weight gain, when another PFAS (labeled along right-hand axis) is fixed at the 10<sup>th</sup>, 50<sup>th</sup>, or 90<sup>th</sup> percentiles, to illustrate potential interactions. **Part (C)** shows the overall effect of exposure to the PFAS mixture on gestational weight gain, comparing the effect when all PFAS are set to a certain quantile compared to when all are set at their median value (50<sup>th</sup> percentile). **Part (D)** compares gestational weight gain when each PFAS is at its 75<sup>th</sup> versus its 25<sup>th</sup> percentile, and other PFAS are held at their 25<sup>th</sup>, 50<sup>th</sup>, or 75<sup>th</sup> percentiles.

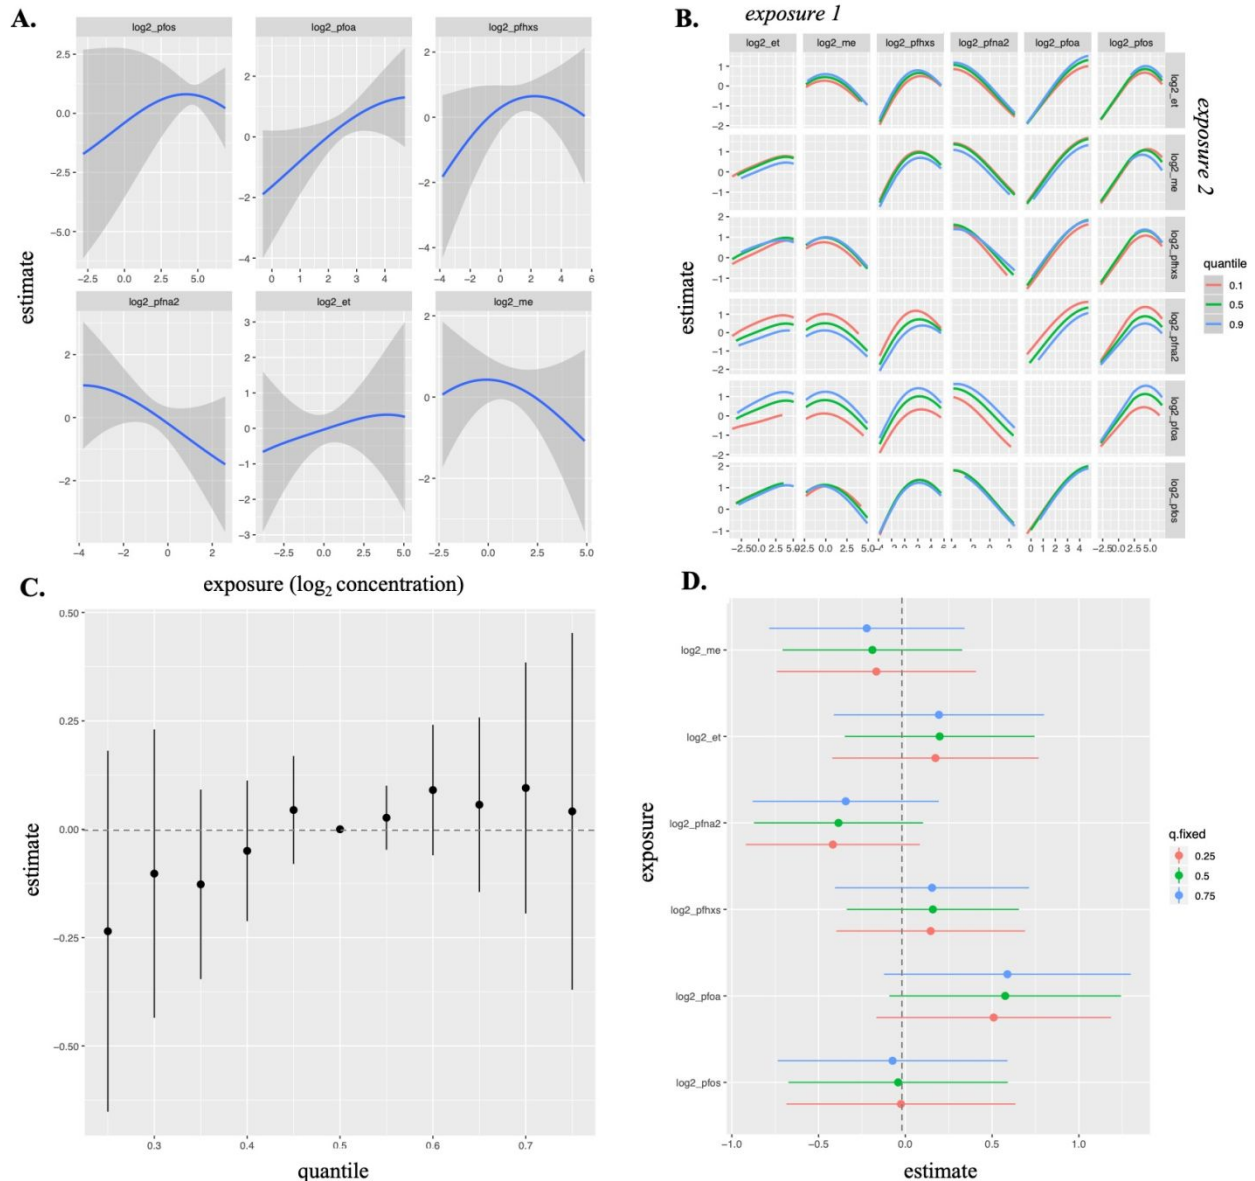

**Supplemental Figure S2.** Joint effect of the mixture of PFAS chemicals on 1-year postpartum weight retention. Models adjusted for age, pre-pregnancy BMI, marital status, race/ethnicity, education, income, smoking, and parity. **Part (A)** shows the association and 95% credible intervals between each PFAS and 1-year postpartum weight retention, holding all other PFAS fixed at the median. **Part (B)** shows bivariate relationships. In each rectangle, the three lines show the varying shape of the association between one PFAS (labeled along the top axis) and 1-year postpartum weight retention, when another PFAS (labeled along right-hand axis) is fixed at the 10<sup>th</sup>, 50<sup>th</sup>, or 90<sup>th</sup> percentiles, to illustrate potential interactions. **Part (C)** shows the overall effect of exposure to the PFAS mixture on 1-year postpartum weight retention, comparing the effect when all PFAS are set at a certain percentile compared to when all are set at their median value (50<sup>th</sup> percentile). **Part (D)** compares 1-year postpartum weight retention when each PFAS is at its 75<sup>th</sup> versus its 25<sup>th</sup> percentile, and other PFAS are held at their 25<sup>th</sup>, 50<sup>th</sup>, or 75<sup>th</sup> percentiles.

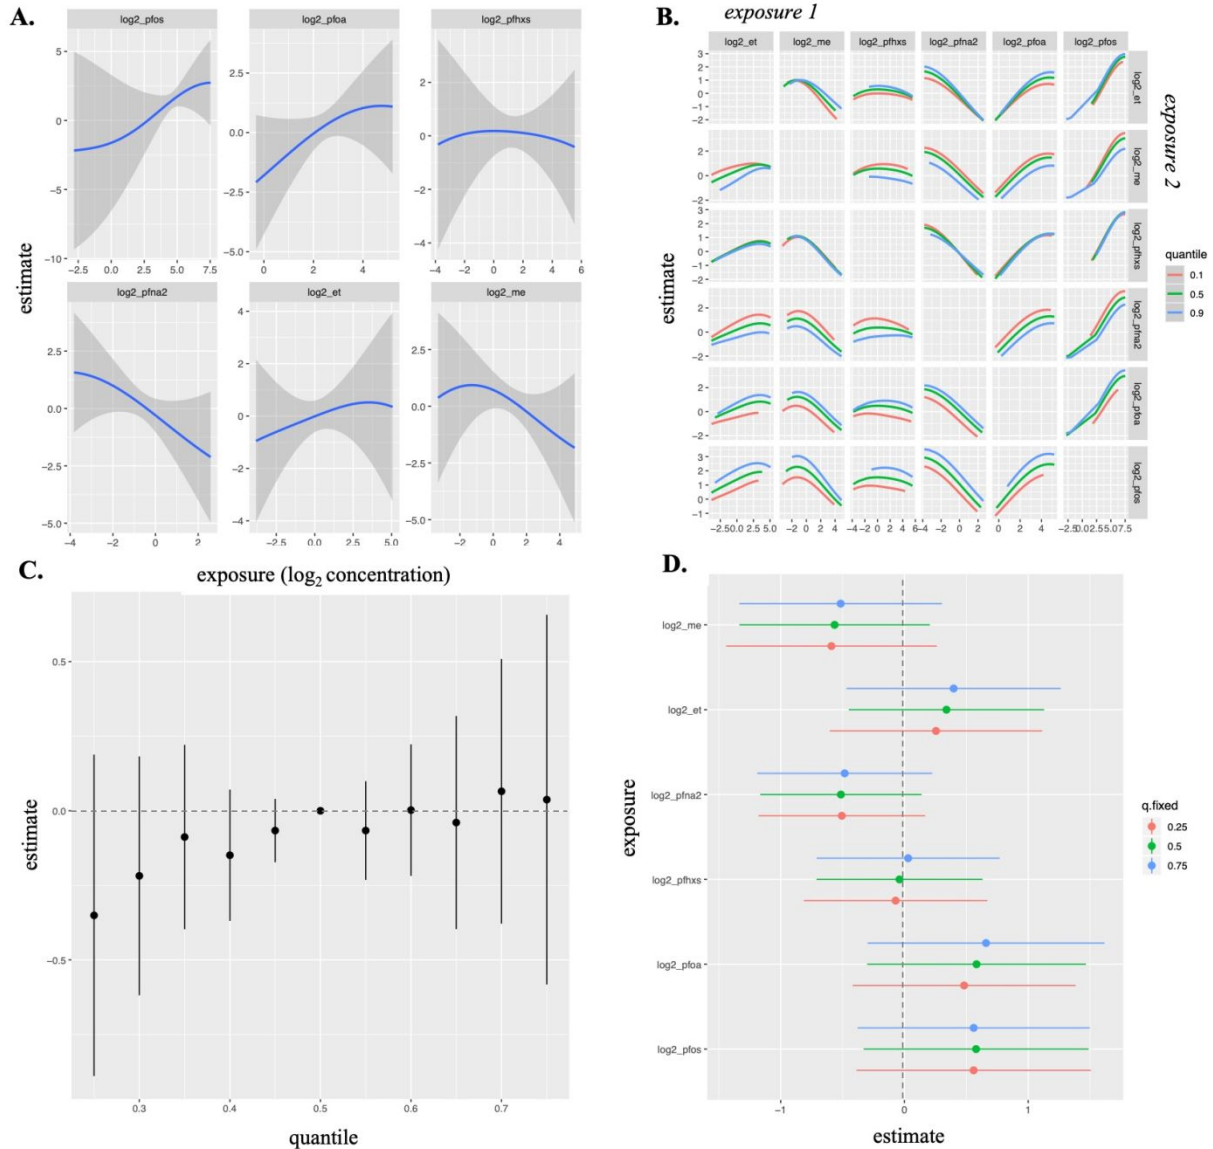

**Supplemental Figure S3.** Joint effect of the mixture of PFAS chemicals on 3-year postpartum weight change. Models adjusted for age, pre-pregnancy BMI, marital status, race/ethnicity, education, income, smoking, and parity. **Part (A)** shows the association and 95% credible intervals between each PFAS and 3-year postpartum weight change, holding all other PFAS fixed at the median. **Part (B)** shows bivariate relationships. In each rectangle, the three lines show the varying shape of the association between one PFAS (labeled along the top axis) and 3-year postpartum weight change, when another PFAS (labeled along right-hand axis) is fixed at the 10<sup>th</sup>, 50<sup>th</sup>, or 90<sup>th</sup> percentiles, to illustrate potential interactions. **Part (C)** shows the overall effect of exposure to the PFAS mixture on 3-year postpartum weight change, comparing the effect when all PFAS are held at a certain percentile compared to when all are held at their median value (50<sup>th</sup> percentile). **Part (D)** compares 3-year postpartum weight change when each PFAS is at its 75<sup>th</sup> versus its 25<sup>th</sup> percentile, and other PFAS are held at their 25<sup>th</sup>, 50<sup>th</sup>, or 75<sup>th</sup> percentiles.
